# Supplementary material
Source: bioRxiv or medRxiv preprint supplement (https://medrxiv.org/content/medrxiv/early/2024/11/23/2024.11.20.24313385/DC1/embed/media-1.pdf)
Supplement: Supplementary file [file media-1.pdf]

# Supplementary Material to “Evaluating the Limitations of Large Language Models in Therapeutic Decision-making for patients with Aortic Stenosis”

Tobias Roeschl, MD<sup>1,2,3,4</sup>, Marie Hoffmann, PhD<sup>1,2,4</sup>, Djawid Hashemi, MD<sup>2,3,4,5</sup>, Felix Rarreck<sup>1,2</sup>, Nils Hinrichs, MSc<sup>1,2,4</sup>, Tobias D. Trippel, MD<sup>2,4,5</sup>, Axel Unbehau, MD<sup>1,2</sup>, Christoph Klein, MD<sup>2,5</sup>, Jörg Kempfert, MD<sup>1,2</sup>, Henryk Dreger, MD<sup>2,5</sup>, Benjamin O’Brien, MD<sup>2,6,7</sup>, Gerhard Hindricks, MD<sup>2,5</sup>, Felix Balzer, MD, PhD<sup>2,8</sup>, Volkmar Falk, MD<sup>1,2,4,9</sup>, Alexander Meyer, MD<sup>1,2,4,10</sup>

## Supplementary methods

### Access to LLMs

We accessed the GPT models and PaLM 2 using the application programming interfaces (API) of OpenAI and Google, respectively. Mistral and Llama 2 were accessed through the REST API of perplexity. BioGPT was downloaded from Huggingface and run locally.<sup>1</sup>

For all LLMs except BioGPT and Mistral, we were able to clearly demonstrate that the LLMs were familiar with the 2021 ESC/EACTS Guidelines for the management of valvular heart disease<sup>2</sup> and could correctly recite key contents.

### Language

All medical reports were originally available in German and were fed into the LLMs as such except for BioGPT. Since BioGPT has not been sufficiently trained on German text data, we translated the original medical reports to English using Python's deep-translator (version 1.11, module: GoogleTranslator) for these experiments.

### Handling of input size constraints

When the model-specific text input sizes were exceeded, we broke up the text into chunks and modified the prompt to inform the model about contiguous patient data. We established context by adding the preceding output. The context sizes are given in Table S1 and range from 1,024 (BioGPT) to 128,000 tokens (GPT-4 Turbo). The median token counts and average number of prompts are shown in Table S2 and Table S3.

### Institutional Heart Team

Our institutional Heart Team (HT) is comprised of interventional cardiologists, cardiac surgeons, imaging specialists and cardiac anesthesiologists. It is mandatory that at least one representative of the aforementioned specialties participates in an HT meeting. HT meetings are held every two weeks to make treatment decisions for patients with coronary artery disease, valve disorders and structural heart disease.

The HT follows a structured decision-making process outlined in the HT protocol (Figure S1). In this process, decision-relevant patient data (e.g., patient characteristics, comorbidities, anatomical aspects) previously extracted from discharge letters and diagnostic imaging reports is presented along with imaging scans to the HT members. Surgical risk scores are calculated and documented in the HT protocol along with decision-relevant patient data. Patients are assigned to the respective treatment modality according to a guideline-guided approach as depicted by the structure of the HT protocol.

For patients in our study cohort, the ESC/EACTS Guidelines for the management of valvular heart disease<sup>2</sup>, published online in August 2021, were used as the basis for decision making. The members of the Heart Team are collectively committed to follow these guidelines. If a patient requests a different therapy from that recommended by the Heart Team, this is documented in the HT protocol. In our study, the therapy decisions made by the LLMs were compared to the primary therapy recommendations by the HT, regardless of the patient's preferences. This was the case for one out of 80 patients in our study cohort.

### Reference model details

The reference model represented an algorithmic emulation of the ESC/EACTS Guidelines for the management of valvular heart disease.<sup>2</sup> The reference model consisted of a decision tree combined with a weighted sum model (WSM). The decision tree assigned patients to either SAVR or TAVR according to the flowchart outlined in Figure S2. For patients who could not be unambiguously assigned to one or the other treatment modality according to the flowchart, we applied the WSM to arrive at a treatment decision. The WSM linearly combined decision-relevant clinical variables  $v$  and corresponding weights  $w$  to arrive at a WSM score  $S$ :

$$S = \sum_i w_i v_i$$

$S \leq 0$  indicated a decision for SAVR and a  $S > 0$  indicated a decision for TAVR. The input data for the reference model was extracted from the HT protocols. The WSM included variables listed in the ESC/EACTS guidelines<sup>2</sup> shown in Table S4. The variable weights were determined via a consensus-seeking process among cardiologists and cardiac surgeons (Table S5). Performance metrics were calculated accordingly for the reference model, except that the ICC was set to 1 and the entropy set to 0 due to the purely deterministic nature of the reference model.

## Supplementary Figures

# Heart Team Protocol

|                           |                        |
|---------------------------|------------------------|
| Last Name _____           | Log. EuroScore _____ % |
| First Name _____          | EuroScore II _____ %   |
| Date of Birth _____       | STS _____ %            |
| Referring Physician _____ | Calculated by _____    |

### Symptoms:

- Dyspnea (NYHA Stage : \_\_\_\_)
- Syncope  Angina pectoris

### Indication:

#### Indication for Interventional Procedure

##### 1. Prohibitive Surgical Risk

- log. EuroSCORE  $\geq 20\%$ , EuroSCORE II  $\geq 10\%$  or STS  $\geq 8\%$

##### 2. Intermediate Surgical Risk and Additional Risk Factors

- Log. EuroSCORE  $\geq 10\%$ , EuroSCORE II  $\geq 4\%$  or STS  $\geq 4\%$
- Life-limiting comorbidity \_\_\_\_\_
- HFrEF, LVEF  $\leq 40\%$  \_\_\_\_\_
  - COPD (GOLD stage  $\geq III$ ) \_\_\_\_\_
  - Pulmonary hypertension \_\_\_\_\_
  - Active neoplasia \_\_\_\_\_
  - Liver cirrhosis and/or portal hypertension)
- Anatomical factors unfavourable for SAVR
- Porcelain aorta
  - Previous chest radiation
  - Previous cardiac surgery
  - High likelihood of patient-prosthesis mismatch
  - Scoliosis/thorax deformity
- Relevant comorbidities, s/p organ transplantation, immunosuppressive therapy
- Frailty/Immobility
- Advanced age ( $\geq 80$  years)
- other: \_\_\_\_\_

##### 3. Low Risk Score

- explicit patient will

---

### Final Recommendation:

#### Procedure

- transfemoral  transaxillary  \_\_\_\_\_
- transapical  transaortic Valve Type: \_\_\_\_\_
- surgical  conservative Size: \_\_\_\_\_ mm

Urgency:  elective  urgent (in this stay)  emergency

#### Preprocedural conduction abnormalities:

- 1<sup>st</sup> degree AV Block  RBBB  Bradycardic atrial fibrillation

### Figure S1: Heart Team Protocol

Our institutional Heart Team (HT) protocols included the HT's treatment decision in addition to decision-relevant patient characteristics. These patient characteristics were used to create case summaries for the SUM and SUM+ experiments and were used as input for the reference model. RBBB: Right bundle branch block. Abbreviations as in Tables S1-2.

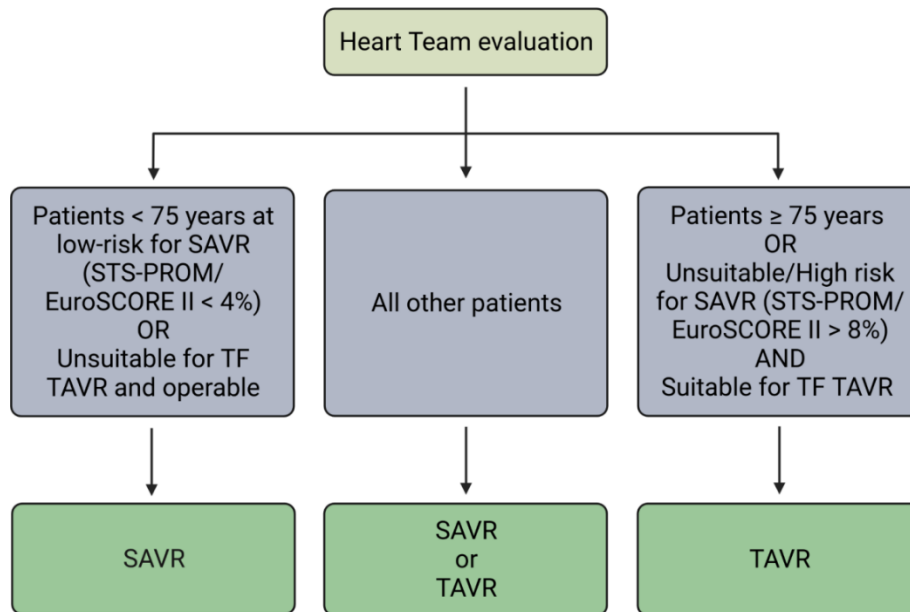

**Figure S2: Flowchart for the management of patients with severe AS**

Management of patients with severe aortic stenosis (AS) according to the 2021 ESC/EACTS Guidelines for the management of valvular heart disease.<sup>2</sup> TF: Transfemoral. Other abbreviations as in Tables S1-2.

## Supplementary Tables

| Model Name      | Version                         | Model Size                                                                                                               | Pre-Training                                                                                                                                                                                                                             | Task            | Context Size |
|-----------------|---------------------------------|--------------------------------------------------------------------------------------------------------------------------|------------------------------------------------------------------------------------------------------------------------------------------------------------------------------------------------------------------------------------------|-----------------|--------------|
| BioGPT          | microsoft/BioGPT-Large-PubMedQA | $359 \times 10^6$                                                                                                        | large scale biomedical literature                                                                                                                                                                                                        | Text generation | 1,024        |
| ChatGPT-3.5     | gpt-3.5-turbo-0613              | $175 \times 10^9$                                                                                                        | $500 \times 10^9$ tokens including books, Wikipedia, academic papers, and WordPress-based websites until September 2021. Fine-tuned via reinforcement learning with human feedback (RLHF).                                               | Chat completion | 4,096        |
| ChatGPT-4       | gpt-4-0613                      | $\sim 1-1.8 \times 10^{12}$ based on 16 models with 110 billion parameters each, connected by a Mixture of Experts (MoE) | $13 \times 10^{13}$ tokens including data from CommonCrawl, RefinedWeb, and social media until September 2021, with some select information from beyond that date. The model was fine-tuned with data from ScaleAI and internal sources. | Chat completion | 8,192        |
| ChatGPT-4 Turbo | gpt-4-1106-preview              | $\sim 1-1.8 \times 10^{12}$ based on 16 models with 110 billion parameters each, connected by a Mixture of Experts (MoE) | $13 \times 10^{13}$ tokens including data from CommonCrawl, RefinedWeb, and social media until September 2021, with some select information from beyond that date. The model was fine-tuned with data from ScaleAI and internal sources. | Chat completion | 128,000      |
| Llama 2         | Llama 2-70b-chat                | $73 \times 10^9$                                                                                                         | $2 \times 10^{12}$ tokens of data from publicly available sources between January and July 2023 SFT on publicly available instruction datasets and RLHF on over one million human-annotated examples.                                    | Chat completion | 4,096        |
| Mistral         | mistral-7b-instruct             | $7 \times 10^9$                                                                                                          | Pre-trainset unknown, fine-tuned using a variety of publicly available conversation datasets.                                                                                                                                            | Text generation | 4,096        |

|        |                |                   |                                                                         |                 |        |
|--------|----------------|-------------------|-------------------------------------------------------------------------|-----------------|--------|
| PaLM 2 | text-bison-32k | $540 \times 10^9$ | Web documents, books, source code, mathematics, and conversational data | Text generation | 32,000 |
|--------|----------------|-------------------|-------------------------------------------------------------------------|-----------------|--------|

**Table S1: Model cards**

Model version refers to the identifiers used for each Application Programming Interface (API). Model size is given as the estimated number of trainable parameters. The context size refers to the maximum number of tokens per prompt. Note that detailed model sizes, architectures, training sets and methods are not disclosed by OpenAI (GPT-X) and Google (PaLM 2) and are listed without warranty for correctness. Details on the training data of pre-trained and fine-tuned Llama 2 models are also not publicly available.

| Model       | RAW  | RAW+ | SUM | SUM+ | SUM <sub>LLM+</sub> |
|-------------|------|------|-----|------|---------------------|
| BioGPT      | 6.4  | 6.6  | 1.0 | 1.0  | -                   |
| GPT-3.5     | 2.14 | 2.24 | 1.0 | 1.0  | -                   |
| GPT-4       | 1.18 | 1.27 | 1.0 | 1.0  | -                   |
| GPT-4 Turbo | 1.0  | 1.0  | 1.0 | 1.0  | 1.0                 |
| Llama 2     | 1.85 | 2.0  | 1.0 | 1.0  | -                   |
| Mistral     | 1.7  | 1.8  | 1.0 | 1.0  | -                   |
| PaLM 2      | 1.0  | 1.0  | 1.0 | 1.0  | -                   |

**Table S2: Number of prompts per model and experiment**

For each model and experiment the average number of prompts needed to present a complete patient case are shown. The number of prompts is contingent upon the context window size (Table S1) and the model-specific tokenizers.



| Experiment           | Median Token Count Per Prompt (IQR) |
|----------------------|-------------------------------------|
| RAW                  | 4,445 (2,766 - 6,061)               |
| RAW+                 | 4,767 (3,088 - 6,383)               |
| SUM                  | 246 (244 - 248)                     |
| SUM+                 | 568 (566 - 570)                     |
| SUM <sub>LLM</sub> + | 1,426 (1,322 - 1,531)               |

**Table S3: Token counts**

For each experiment, median token counts per prompt are reported with interquartile ranges (IQR). Abbreviations as in Tables S1-2.

|                                                                                                                                                | Favors<br>TAVR | Favors<br>SAVR |
|------------------------------------------------------------------------------------------------------------------------------------------------|----------------|----------------|
| <b>Clinical characteristics</b>                                                                                                                |                |                |
| Lower surgical risk                                                                                                                            | -              | +              |
| Higher surgical risk                                                                                                                           | +              | -              |
| Younger age                                                                                                                                    | -              | +              |
| Older age                                                                                                                                      | +              | -              |
| Previous cardiac surgery (particularly intact coronary artery bypass grafts at risk of injury during repeat sternotomy)                        | +              | -              |
| Severe frailty                                                                                                                                 | +              | -              |
| Active or suspected endocarditis                                                                                                               | -              | +              |
| <b>Anatomical and procedural factors</b>                                                                                                       |                |                |
| TAVR feasible via transfemoral approach                                                                                                        | +              | -              |
| Transfemoral access challenging or impossible and SAVR feasible                                                                                | -              | +              |
| Transfemoral access challenging or impossible and SAVR inadvisable                                                                             | +              | -              |
| Sequelae of chest radiation                                                                                                                    | +              | -              |
| Porcelain aorta                                                                                                                                | +              | -              |
| High likelihood of severe patient-prosthesis mismatch (AVA < 0.65 cm <sup>2</sup> /m <sup>2</sup> )                                            | +              | -              |
| Severe chest deformation or scoliosis                                                                                                          | +              | -              |
| Aortic annular dimensions unsuitable for available TAVR devices                                                                                | -              | +              |
| Bicuspid aortic valve                                                                                                                          | -              | +              |
| Valve morphology unfavourable for TAVR (e.g., high risk of coronary obstruction due to low coronary ostia or heavy leaflet/LVOT calcification) | -              | +              |
| Thrombus in aorta or LV                                                                                                                        | -              | +              |
| <b>Concomitant cardiac conditions requiring intervention</b>                                                                                   |                |                |
| Significant multi-vessel CAD requiring surgical revascularization                                                                              | -              | +              |
| Severe primary mitral valve disease                                                                                                            | -              | +              |
| Severe tricuspid valve disease                                                                                                                 | -              | +              |
| Significant dilatation/aneurysm of the aortic root and/or ascending aorta                                                                      | -              | +              |
| Septal hypertrophy requiring myectomy                                                                                                          | -              | +              |

**Table S4: Decision-relevant clinical variables according to the 2021 ESC/EACTS Guidelines for the management of valvular heart disease**

Decision-relevant clinical variables favoring either SAVR or TAVR according to the 2021 ESC/EACTS Guidelines for the management of valvular heart disease.<sup>2</sup> AVA: aortic valve area, BSA: body surface area, CAD: coronary artery disease, LVOT: Left-ventricular outflow tract. Other abbreviations as in Figure S1.

| Variables from our institutional HT protocol                                             | Weights |
|------------------------------------------------------------------------------------------|---------|
| Severe CAD requiring surgical revascularization                                          | -1      |
| Left-ventricular ejection fraction < 40 %                                                | 1       |
| COPD                                                                                     | 1       |
| Pulmonary arterial hypertension                                                          | 1       |
| Active neoplasia                                                                         | 1       |
| Liver cirrhosis                                                                          | 1       |
| Porcelain aorta                                                                          | 5       |
| Sequelae of chest radiation                                                              | 1       |
| Previous cardiac surgery                                                                 | 1       |
| Expected patient-prosthesis mismatch                                                     | 1       |
| Severe chest deformation or scoliosis                                                    | 1       |
| Under immunosuppressive therapy                                                          | 1       |
| Frailty                                                                                  | 5       |
| Cachexia (BMI < 18.5 kg/m <sup>2</sup> ) or morbid obesity (BMI ≥ 40 kg/m <sup>2</sup> ) | 1       |

**Table S5: Variables of the weighted sum model**

Variables and variable weights of the weighted sum model (WSM) are shown. The WSM was applied to arrive at a treatment decision for patients who could not be unambiguously assigned to either surgical- or transcatheter aortic valve replacement according to the flowchart shown in Figure S2. The variable weights were determined via a consensus-seeking process among cardiologists and cardiac surgeons. BMI: body mass index. Other abbreviations as in Table S4.

| Experiment          | Prompt Template                                                                                                                                                                                                                                                                                                                                                                                                                                                                                                                                                                                                                                                                                                                                                                                                                                                                                                                                                                                                                                                                                                                                                                                                                                                                                                                                                                                                                                                                                                                                                                                                                                                                                                                                                                                                                                                                                                        |
|---------------------|------------------------------------------------------------------------------------------------------------------------------------------------------------------------------------------------------------------------------------------------------------------------------------------------------------------------------------------------------------------------------------------------------------------------------------------------------------------------------------------------------------------------------------------------------------------------------------------------------------------------------------------------------------------------------------------------------------------------------------------------------------------------------------------------------------------------------------------------------------------------------------------------------------------------------------------------------------------------------------------------------------------------------------------------------------------------------------------------------------------------------------------------------------------------------------------------------------------------------------------------------------------------------------------------------------------------------------------------------------------------------------------------------------------------------------------------------------------------------------------------------------------------------------------------------------------------------------------------------------------------------------------------------------------------------------------------------------------------------------------------------------------------------------------------------------------------------------------------------------------------------------------------------------------------|
| RAW                 | <p>PROMPT_INTRO = "Assume a person is with a severe aortic stenosis. {raw_data} Based on the guidelines would the recommended treatment be TAVR or SAVR? Conservative therapy is no option. Please, answer short."</p> <p>PROMPT_CONT = "Here are more findings for the same patient. {raw_data} Based on the guidelines would the recommended treatment be TAVR or SAVR? Conservative therapy is no option. Please, answer short."</p>                                                                                                                                                                                                                                                                                                                                                                                                                                                                                                                                                                                                                                                                                                                                                                                                                                                                                                                                                                                                                                                                                                                                                                                                                                                                                                                                                                                                                                                                                |
| RAW+                | <p>PROMPT_SUM_CPG = "{cpg_content} {raw_data} Based on the guidelines would the recommended treatment be TAVR or SAVR? Conservative therapy is no option. Please, answer short."</p> <p>PROMPT_CONT = "Here are more findings for the same patient. {raw_data} Based on the guidelines would the recommended treatment be TAVR or SAVR? Conservative therapy is no option. Please, answer short."</p>                                                                                                                                                                                                                                                                                                                                                                                                                                                                                                                                                                                                                                                                                                                                                                                                                                                                                                                                                                                                                                                                                                                                                                                                                                                                                                                                                                                                                                                                                                                  |
| SUM                 | <p>PROMPT_SUM = "Assume a person is suffering from severe aortic stenosis. {summary} Based on the guidelines would the recommended treatment be TAVR or SAVR? Conservative therapy is no option. Please, answer short."</p>                                                                                                                                                                                                                                                                                                                                                                                                                                                                                                                                                                                                                                                                                                                                                                                                                                                                                                                                                                                                                                                                                                                                                                                                                                                                                                                                                                                                                                                                                                                                                                                                                                                                                            |
| SUM <sub>LLM+</sub> | <p>PROMPT_SUM_LLM_1 = "These are the medical reports of a fictitious patient with severe aortic stenosis who is being assessed for aortic valve replacement: {raw_data}.</p> <p>You are a doctor writing a clinical vignette containing the decision-relevant patient data needed to decide whether the fictional patient should receive TAVR or SAVR according to the ESC 2021 guidelines.</p> <p>The clinical vignette must include:</p> <ol style="list-style-type: none"> <li>1. patient age</li> <li>2. EuroSCORE II</li> <li>3. previous cardiac surgeries</li> <li>4. comorbidities</li> <li>5. vascular anomalies of the iliac arteries and/or the aorta complicating TAVR</li> <li>6. whether the patient is frail</li> <li>7. active endocarditis</li> <li>8. previous chest radiation</li> <li>9. porcelain aorta</li> <li>10. has a likelihood of severe patient-prosthesis mismatch (indicated by aortic valve area &lt; 0.65 cm<sup>2</sup>/m<sup>2</sup> body surface area)</li> <li>11. severe thoracic deformity and/or scoliosis</li> <li>12. aortic annulus dimensions unsuitable for TAVR</li> <li>13. bicuspid aortic valve</li> <li>14. low coronary ostia (indicated by a lower left coronary artery height &lt; 12 mm)</li> <li>15. thrombus in the aorta and/or the left ventricle</li> <li>16. significant multivessel coronary artery disease requiring surgical re-vascularisation</li> <li>17. severe primary mitral valve disease</li> <li>18. severe tricuspid valve disease</li> <li>19. significant dilatation of the ascending aorta &gt; 45 mm and/or septal hypertrophy (as indicated by interventricular septal thickness &gt; 17 mm)</li> </ol> <p>If the EuroSCORE II is not provided, calculate it on your own. Limit the clinical vignette to a running text with a maximum of 1,000 words. Do not give a treatment decision, restrict yourself to writing the vignette."</p> |

|                                                         |                                                                                                                                                                                                                                                                                                                                                                                                                                                                                                                                                                                                                                                                                                                                                                                                                                                                                                                                                                                                                                                                                                                                                                                                                                                                                                                                                                                                                                                                                                                                                                                                                                                                                       |
|---------------------------------------------------------|---------------------------------------------------------------------------------------------------------------------------------------------------------------------------------------------------------------------------------------------------------------------------------------------------------------------------------------------------------------------------------------------------------------------------------------------------------------------------------------------------------------------------------------------------------------------------------------------------------------------------------------------------------------------------------------------------------------------------------------------------------------------------------------------------------------------------------------------------------------------------------------------------------------------------------------------------------------------------------------------------------------------------------------------------------------------------------------------------------------------------------------------------------------------------------------------------------------------------------------------------------------------------------------------------------------------------------------------------------------------------------------------------------------------------------------------------------------------------------------------------------------------------------------------------------------------------------------------------------------------------------------------------------------------------------------|
|                                                         | PROMPT_SUM_LLM_2 = "Assume a person is suffering from severe aortic stenosis. {summary_llm} Based on the guidelines would the recommended treatment be TAVR or SAVR? Conservative therapy is no option. Please, answer short."                                                                                                                                                                                                                                                                                                                                                                                                                                                                                                                                                                                                                                                                                                                                                                                                                                                                                                                                                                                                                                                                                                                                                                                                                                                                                                                                                                                                                                                        |
| cpg_content                                             | "The guidelines recommended SAVR in younger patients (<75 years) at low surgical risk (i.e., STS-PROM score < 4 % or EuroSCORE II < 4 %). In older patients (≥75 years), or those who are inoperable or at high surgical risk (i.e., STS-PROM>8 % or EuroSCORE II > 8 %) TAVR is preferred. All other patients should be assessed for either TAVR or SAVR including other factors: For these patients SAVR is favoured: Lower surgical risk (according to STS-score, EuroSCORE II or logistic EuroSCORE), younger age, transfemoral access challenging or impossible and SAVR feasible, aortic annular dimensions unsuitable for available TAVR devices, bicuspid aortic valve, valve morphology unfavourable for TAVR (e.g. high risk of coronary obstruction due to low coronary ostia or heavy leaflet/LVOT calcification), a thrombus within the left ventricle, significant multi-vessel coronary artery disease requiring surgical revascularization, severe primary mitral valve disease, severe tricuspid disease, significant dilatation/aneurysm of the aortic root and/or ascending aorta and septal hypertrophy requiring myectomy. For these patients TAVR is recommended: higher surgical risk (according to STS-score, EuroSCORE II or logistic EuroSCORE), older age, previous cardiac surgery (particularly intact coronary artery bypass grafts at risk of injury during repeat sternotomy), severe frailty, TAVR feasible via transfemoral approach, sequelae of chest radiation, porcelain aorta, high likelihood of severe patient–prosthesis mismatch (AVA <0.65 cm <sup>2</sup> /m <sup>2</sup> body surface area) and severe chest deformation or scoliosis." |
| summary (Example of a physician-generated case summary) | "The patient is aged 75 years or above*. The logistic EuroSCORE is missing, the EuroSCORE II is 12.99 %, the STS score is missing. The patient does not have coronary heart disease requiring treatment. The patient does not have a left-ventricular ejection fraction <= 40 %. The patient does not have chronic obstructive pulmonary disease GOLD Stage III or higher. The patient does not have pulmonary arterial hypertension. The patient has active malignancy. The patient does not have liver cirrhosis. The patient does not have a porcelain aorta. The patient does not have significant thorax deformity or scoliosis. The patient does not have a relevant pre-existing comorbidity that, for example, requires immunosuppression. The patient is not status post chest radiation. The patient is not status post cardiac surgery. The patient is not at high risk for prosthesis-patient mismatch. The patient is frail. The patient is not suffering from either cachexia or malignant obesity. " *for data protection reasons, the specific age is not given here                                                                                                                                                                                                                                                                                                                                                                                                                                                                                                                                                                                                  |

**Table S6: Prompt templates**

Prompt templates used to communicate with the LLMs. The prompt templates were filled with the original medical reports (RAW) or case summaries generated by either physicians (SUM) or an LLM (SUM<sub>LLM</sub>) and/or a resume of the ESC/EACTS guidelines<sup>2</sup> positionally indicated by the variables raw\_data, summary and cpg\_content, respectively. Abbreviations as in Figure S4.

| Example Completion                                                                                                                                                                                                           | Decision      |
|------------------------------------------------------------------------------------------------------------------------------------------------------------------------------------------------------------------------------|---------------|
| "Based on the guidelines, the recommended treatment for a patient with severe aortic stenosis would be TAVR (Transcatheter Aortic Valve Replacement)."                                                                       | TAVR          |
| "Based on the guidelines and the patient's characteristics, the recommended treatment would be TAVR (Transcatheter Aortic Valve Replacement)."                                                                               |               |
| "Based on the guidelines, the recommended treatment for the patient would be SAVR (surgical aortic valve replacement)."                                                                                                      | SAVR          |
| "The recommended treatment would be SAVR."                                                                                                                                                                                   |               |
| "Based on the given information, the recommended treatment would be SAVR (Surgical Aortic Valve Replacement)."                                                                                                               |               |
| "Based on the findings provided, the recommended treatment would be TAVR (Transcatheter Aortic Valve Replacement) or SAVR (Surgical Aortic Valve Replacement)."                                                              | Indeterminate |
| "Based on the guidelines, the recommended treatment for a person with severe aortic stenosis would be TAVR (Transcatheter Aortic Valve Replacement) if they are at higher surgical risk or older, and SAVR"                  |               |
| "Based on the provided information, it is not possible to determine whether TAVR or SAVR would be the recommended treatment without further details."                                                                        |               |
| "Based on the guidelines provided, the recommended treatment for a person with severe aortic stenosis would be TAVR (Transcatheter Aortic Valve Replacement) if they are older ( $\geq 75$ years) or at high surgical risk." |               |

**Table S7: LLM completions**

Representative LLM responses and their corresponding categorization into a treatment decision. The left column shows the most common responses we retrieved during our experiments.

| Target                                                                                                                             | Performance metric                              | Description                                                                                                                                                                                                                                | Handling of indeterminate responses                                                                                                                                                                                         | Interpretation                                                                                                                                                                                                                                                                                 |
|------------------------------------------------------------------------------------------------------------------------------------|-------------------------------------------------|--------------------------------------------------------------------------------------------------------------------------------------------------------------------------------------------------------------------------------------------|-----------------------------------------------------------------------------------------------------------------------------------------------------------------------------------------------------------------------------|------------------------------------------------------------------------------------------------------------------------------------------------------------------------------------------------------------------------------------------------------------------------------------------------|
| <b>Concordance</b> ("Were the treatment decisions provided by the LLMs concordant with the HT's treatment decisions?")             | <b>Accuracy</b>                                 | Accuracy was defined as the proportion of treatment decisions that agreed with the treatment decisions provided by the Heart Team.                                                                                                         | Indeterminate responses were classified as "wrong" decisions, meaning they were set to the opposite of the respective HT decision.                                                                                          | Due to the class imbalance in our patient cohort, a model that exclusively outputs the majority class (i.e., "TAVR") achieves an accuracy of 70 %.                                                                                                                                             |
|                                                                                                                                    | <b>Interrater agreement</b>                     | Cohen's kappa coefficients were used to measure the interrater agreement between treatment decisions provided by the LLMs and the Heart Team. The LLMs' treatment decisions were aggregated by a majority vote of the 10 runs per patient. | Indeterminate responses were classified as "wrong" decisions, meaning they were set to the opposite of the respective HT decision.                                                                                          | Cohen's kappa coefficients $\leq 0$ indicate no agreement, 0.01-0.20 slight, 0.21-0.40 fair, 0.41-0.60 moderate, 0.61-0.80 substantial, and 0.81-1.0 almost perfect agreement. <sup>3</sup>                                                                                                    |
| <b>Reliability</b><br>("To what extent did the LLMs' treatment decisions vary when the same patient case was presented 10 times?") | <b>Unanimous accuracy</b>                       | Unanimous accuracy was defined as the proportion of patients in whom a LLM provided the accurate treatment decisions unanimously for all 10 runs. This metric allowed us to concomitantly quantify model reliability and concordance.      | Indeterminate responses were classified as "wrong" decisions, meaning they were set to the opposite of the respective HT decision.                                                                                          | -                                                                                                                                                                                                                                                                                              |
|                                                                                                                                    | <b>Intraclass correlation coefficient (ICC)</b> | ICCs were used to measure test-retest-reliability given ten runs per patient. ICCs were calculated based on a one-way random effects, absolute agreement, single-rater model <sup>4</sup> using Python's pingouin package (version 0.5.3). | Indeterminate responses were re-classified as either "TAVR" or "SAVR" through random sampling with replacement and weights corresponding to the prevalence of HT treatment decisions for TAVR and SAVR in our study cohort. | ICCs < 0.5 indicate poor, 0.50-0.75 moderate, 0.75-0.90 good, > 0.90 excellent test-retest reliability. <sup>4</sup><br><br>ICCs are undefined if the between cluster variance is zero, e.g., if the LLM output was always "TAVR" for every run and every patient for a particular experiment. |
|                                                                                                                                    | <b>Entropy</b>                                  | Shannon entropy <sup>5</sup> was used to assess the output variation within 10 runs per patient as follows<br>$H = - \sum p(k) \log_2 p(k)$ ,<br>with $k \in ["TAVR", "SAVR", "indeterminate"]$ and reported as mean normalized entropy.   | Indeterminate responses were included for the calculation of entropy values since entropy allows to quantify output variation for more than two classes.                                                                    | Entropy values close to 0 indicate no variation in model output. Entropy values close to 1 indicate maximum output variation.                                                                                                                                                                  |

|                                                                                            |                                          |                                                                                                                         |                                                                                            |                                                                                                |
|--------------------------------------------------------------------------------------------|------------------------------------------|-------------------------------------------------------------------------------------------------------------------------|--------------------------------------------------------------------------------------------|------------------------------------------------------------------------------------------------|
| <p><b>Bias</b><br/>("Were the LLMs' treatment decisions biased towards TAVR or SAVR?")</p> | <p><b>Frequency bias index (FBI)</b></p> | <p>FBI<sup>6</sup> was defined as the ratio of treatment decisions for TAVR given by the LLM and by the Heart Team.</p> | <p>Indeterminate responses were ignored for the calculation of frequency bias indices.</p> | <p>FBI &gt; 1 indicates bias towards TAVR, whereas FBI &lt; 1 indicates bias towards SAVR.</p> |
| <p><b>Decidability</b> ("How often were the LLMs undecided about treatment?")</p>          | <p><b>Decidability</b></p>               | <p>Decidability was quantified as the proportion of determinate to indeterminate treatment decisions.</p>               | <p>-</p>                                                                                   | <p>-</p>                                                                                       |

**Table S8: Performance metrics and imputation strategies**

To measure concordance and reliability, we used several metrics. This is because accuracy, although intuitive, can be highly misleading in classification tasks with a relevant class imbalance as was the case in our study. Thus, we also calculated Cohen's kappa coefficients to quantify agreement. Intra-class correlation coefficients (ICCs) were used to measure test-retest reliability based on 10 runs per patient. However, ICCs are not defined in cases of zero variance or can be skewed when number of indeterminate answers is high. As entropy has not these limitations, we applied Shannon's entropy to quantify output variation. In addition, we determined unanimous accuracy to concomitantly assess reliability and concordance.



| Experiment          | Model           | Accuracy [unanimous accuracy] | Cohen's Kappa coefficient | Frequency Bias Index (FBI) | Intraclass Correlation Coefficient (ICC) | Entropy | Accurate, Indeterminate, Inaccurate |
|---------------------|-----------------|-------------------------------|---------------------------|----------------------------|------------------------------------------|---------|-------------------------------------|
| RAW                 | BioGPT          | 0.32 [0.05]                   | -0.18                     | 0.95                       | 0.36                                     | 0.29    | (0.32, 0.37, 0.31)                  |
|                     | Mistral         | 0.55 [0.13]                   | -0.02                     | 1.25                       | 0.07                                     | 0.47    | (0.55, 0.2, 0.26)                   |
|                     | Llama 2         | 0.7 [0.61]                    | 0.00                      | 1.43                       | 0.04                                     | 0.04    | (0.69, 0.01, 0.3)                   |
|                     | PaLM 2          | 0.69 [0.69]                   | 0.03                      | 1.42                       | 0.22                                     | 0.00    | (0.69, 0.01, 0.3)                   |
|                     | GPT-3.5         | 0.29 [0.28]                   | -0.47                     | 1.53                       | 0.24                                     | 0.05    | (0.29, 0.54, 0.17)                  |
|                     | GPT-4           | 0.71 [0.7]                    | 0.09                      | 1.39                       | 0.91                                     | 0.01    | (0.71, 0.02, 0.27)                  |
|                     | GPT-4 Turbo     | 0.7 [0.7]                     | 0.00                      | 1.43                       | 0.00                                     | 0.00    | (0.7, 0.0, 0.3)                     |
| RAW+                | BioGPT          | 0.3 [0.1]                     | -0.31                     | 0.90                       | 0.50                                     | 0.17    | (0.29, 0.41, 0.3)                   |
|                     | Mistral         | 0.5 [0.04]                    | 0.04                      | 1.14                       | 0.09                                     | 0.60    | (0.5, 0.24, 0.25)                   |
|                     | Llama 2         | 0.4 [0.01]                    | 0.17                      | 1.2                        | 0.07                                     | 0.50    | (0.4, 0.5, 0.1)                     |
|                     | PaLM 2          | 0.69 [0.69]                   | -0.02                     | 1.42                       | 0.56                                     | 0.00    | (0.69, 0.01, 0.3)                   |
|                     | GPT-3.5         | 0.56 [0.51]                   | -0.12                     | 1.39                       | 0.35                                     | 0.06    | (0.56, 0.24, 0.2)                   |
|                     | GPT-4           | 0.71 [0.63]                   | 0.17                      | 1.37                       | 0.62                                     | 0.06    | (0.7, 0.03, 0.27)                   |
|                     | GPT-4 Turbo     | 0.7 [0.7]                     | 0.00                      | 1.43                       | -                                        | 0.00    | (0.7, 0.0, 0.3)                     |
| SUM                 | BioGPT          | 0.29 [0.05]                   | 0.04                      | 0.82                       | 0.06                                     | 0.42    | (0.29, 0.44, 0.27)                  |
|                     | Mistral         | 0.59 [0.09]                   | 0.00                      | 1.31                       | 0.00                                     | 0.41    | (0.59, 0.12, 0.28)                  |
|                     | Llama 2         | 0.68 [0.54]                   | 0.00                      | 1.4                        | 0.03                                     | 0.06    | (0.68, 0.0, 0.32)                   |
|                     | PaLM 2          | 0.7 [0.7]                     | 0.00                      | 1.44                       | -                                        | 0.00    | (0.7, 0.0, 0.3)                     |
|                     | GPT-3.5         | 0.41 [0.33]                   | -0.25                     | 0.91                       | 0.75                                     | 0.11    | (0.41, 0.15, 0.45)                  |
|                     | GPT-4           | 0.81 [0.68]                   | 0.50                      | 1.15                       | 0.69                                     | 0.11    | (0.81, 0.0, 0.19)                   |
|                     | GPT-4 Turbo     | 0.84 [0.8]                    | 0.54                      | 1.14                       | 0.87                                     | 0.05    | (0.84, 0.0, 0.16)                   |
| SUM+                | BioGPT          | 0.55 [0.04]                   | -0.02                     | 1.14                       | 0.01                                     | 0.56    | (0.55, 0.18, 0.27)                  |
|                     | Mistral         | 0.56 [0.03]                   | 0.00                      | 1.01                       | 0.02                                     | 0.58    | (0.56, 0.07, 0.36)                  |
|                     | Llama 2         | 0.58 [0.14]                   | 0.22                      | 1.21                       | 0.11                                     | 0.49    | (0.58, 0.26, 0.16)                  |
|                     | PaLM 2          | 0.81 [0.81]                   | 0.47                      | 1.24                       | 1.00                                     | 0.00    | (0.81, 0.0, 0.19)                   |
|                     | GPT-3.5         | 0.62 [0.58]                   | 0.33                      | 0.46                       | 0.89                                     | 0.05    | (0.62, 0.0, 0.38)                   |
|                     | GPT-4           | 0.84 [0.83]                   | 0.62                      | 0.98                       | 0.97                                     | 0.01    | (0.84, 0.0, 0.16)                   |
|                     | GPT-4 Turbo     | 0.86 [0.84]                   | 0.61                      | 1.12                       | 0.93                                     | 0.03    | (0.86, 0.0, 0.14)                   |
| SUM <sub>LLM+</sub> | GPT-4 Turbo     | 0.74 [0.74]                   | 0.17                      | 1.20                       | 0.47                                     | 0.14    | (0.74, 0.08, 0.18)                  |
| -                   | Reference Model | 0.83                          | 0.55                      | 1.11                       | 1                                        | 0       | (0.83, 0, 0.17)                     |

**Table S9: Performance metrics**

Numerical values of the performance metrics, portrayed in Figure 2 are shown in addition to the frequencies of accurate, indeterminate and inaccurate treatment recommendations. The “age-only model” refers to a hypothetical decision model that would assign patients to the respective treatment modality exclusively based on patient age (i.e., SAVR if younger than 75 years and otherwise TAVR).

## Supplemental References

1. Wolf T, Debut L, Sanh V, et al. Huggingface's transformers: State-of-the-art natural language processing. *arXiv preprint arXiv:191003771*. 2019;
2. Vahanian A, Beyersdorf F, Praz F, et al. 2021 ESC/EACTS Guidelines for the management of valvular heart disease: Developed by the Task Force for the management of valvular heart disease of the European Society of Cardiology (ESC) and the European Association for Cardio-Thoracic Surgery (EACTS). *European Heart Journal*. 2021;43(7):561-632. doi:10.1093/eurheartj/ehab395
3. McHugh ML. Interrater reliability: the kappa statistic. *Biochem Med (Zagreb)*. 2012;22(3):276-82.
4. Koo TK, Li MY. A Guideline of Selecting and Reporting Intraclass Correlation Coefficients for Reliability Research. *J Chiropr Med*. Jun 2016;15(2):155-63. doi:10.1016/j.jcm.2016.02.012
5. Shannon CE. A mathematical theory of communication. *The Bell System Technical Journal*. 1948;27(3):379-423. doi:10.1002/j.1538-7305.1948.tb01338.x
6. Brill KF. A General Analytic Method for Assessing Sensitivity to Bias of Performance Measures for Dichotomous Forecasts. *Weather and Forecasting*. 01 Feb. 2009 2009;24(1):307-318. doi:10.1175/2008WAF2222144.1
